# Supplementary material for: Phosphine selenides: versatile NMR probes for analyzing hydrogen OH⋯Se and halogen I⋯Se bonds
Source: Royal Society of Chemistry journal article supplement (doi:10.1039/d4cp01895h), 2024-01-01
Supplement: d4cp01895h1.pdf [file d4cp01895h1.pdf]

*Supporting Information for*

**Phosphide Selenides: Versatile NMR Probes for Analyzing Hydrogen and Halogen Bonds**

Anton S. Zakharov,<sup>a</sup> Danil V. Krutin,<sup>a</sup> Pavel. O. Mosalyov,<sup>a</sup> Elena Yu. Tupikina,<sup>a</sup> Aleksandr S. Antonov,<sup>b</sup> Peter M. Tolstoy,<sup>a</sup> Valeriya V. Mulloyarova<sup>\*a</sup>

<sup>a</sup> – Institute of Chemistry, St. Petersburg State University, St. Petersburg, Russia

<sup>b</sup> – University of Regensburg, Regensburg, Germany

\* – Corresponding author: Dr. V.V. Mulloyarova (vmulloyarova@gmail.com)

Table of contents

|                   |                                                                                                                                                                                                                 |           |
|-------------------|-----------------------------------------------------------------------------------------------------------------------------------------------------------------------------------------------------------------|-----------|
| <b>Scheme S1</b>  | Synthesis of phosphine selenides R <sub>3</sub> PSe                                                                                                                                                             | <b>3</b>  |
| <b>Figure S1</b>  | <sup>1</sup> H and <sup>13</sup> C NMR spectra of Me <sub>3</sub> PSe in CDCl <sub>3</sub> at 298 K                                                                                                             | <b>4</b>  |
| <b>Figure S2</b>  | <sup>1</sup> H and <sup>13</sup> C NMR spectra of Et <sub>3</sub> PSe in CDCl <sub>3</sub> at 298 K                                                                                                             | <b>5</b>  |
| <b>Figure S3</b>  | <sup>1</sup> H and <sup>13</sup> C NMR spectra of <i>n</i> -Bu <sub>3</sub> PSe in CDCl <sub>3</sub> at 298 K                                                                                                   | <b>6</b>  |
| <b>Figure S4</b>  | <sup>1</sup> H and <sup>13</sup> C NMR spectra of <i>t</i> -Bu <sub>3</sub> PSe in CDCl <sub>3</sub> at 298 K                                                                                                   | <b>7</b>  |
| <b>Figure S5</b>  | <sup>1</sup> H and <sup>13</sup> C NMR spectra of Ph <sub>3</sub> PSe in CDCl <sub>3</sub> at 298 K                                                                                                             | <b>8</b>  |
| <b>Figure S6</b>  | <sup>1</sup> H and <sup>13</sup> C NMR spectra of MePh <sub>2</sub> PSe in CDCl <sub>3</sub> at 298 K                                                                                                           | <b>9</b>  |
| <b>Figure S7</b>  | <sup>1</sup> H NMR spectra of hydrogen-bonded complexes of Et <sub>3</sub> PSe with various substituted phenols in solution in CD <sub>2</sub> Cl <sub>2</sub> at 180 K                                         | <b>10</b> |
| <b>Figure S8</b>  | <sup>1</sup> H and <sup>31</sup> P NMR spectra of hydrogen-bonded complex of Et <sub>3</sub> PSe with 4-chlorophenol in solution in CDF <sub>3</sub> /CDCIF <sub>2</sub> at 100 K                               | <b>11</b> |
| <b>Figure S9</b>  | <sup>1</sup> H NMR spectra of halogen-bonded complex of Et <sub>3</sub> PSe with 4-fluoroiodobenzene in solution in CDF <sub>3</sub> /CDCIF <sub>2</sub> .                                                      | <b>12</b> |
| <b>Table S1</b>   | Crystal data and structure refinement for halogen-bonded complex of Me <sub>3</sub> PSe with C <sub>6</sub> F <sub>5</sub> I                                                                                    | <b>13</b> |
| <b>Figure S10</b> | <sup>31</sup> P and <sup>77</sup> Se MAS NMR spectra (12.5 kHz) of phosphine selenides Me <sub>3</sub> PSe and <i>t</i> -Bu <sub>3</sub> PSe and their complexes with C <sub>6</sub> F <sub>5</sub> I at 298 K. | <b>14</b> |
| <b>Figure S11</b> | <sup>31</sup> P and <sup>77</sup> Se NMR spectra of phosphine selenides R <sub>3</sub> PSe (where R: Me, Et, <i>n</i> -Bu, <i>t</i> -Bu and Ph) in C <sub>6</sub> F <sub>5</sub> Br at 298 K.                   | <b>15</b> |
| <b>Table S2</b>   | Experimental NMR parameters of the studied phosphine selenide R <sub>3</sub> PSe (where R: Me, Et, <i>n</i> -Bu, <i>t</i> -Bu and Ph) in C <sub>6</sub> F <sub>5</sub> Br at 298 K.                             | <b>16</b> |

|                   |                                                                                                                                                                                   |           |
|-------------------|-----------------------------------------------------------------------------------------------------------------------------------------------------------------------------------|-----------|
| <b>Figure S12</b> | Equilibrium structures of halogen-bonded complexes of phosphine selenides R <sub>3</sub> PSe (R: Me, Et, <i>t</i> -Bu, <i>n</i> -Bu and Ph) with C <sub>6</sub> F <sub>5</sub> Br | <b>17</b> |
| <b>Table S3</b>   | Calculated geometry of halogen-bonded complexes of phosphine selenides R <sub>3</sub> PSe (R: Me, Et, <i>t</i> -Bu, <i>n</i> -Bu and Ph) in vacuum                                | <b>18</b> |

**Scheme S1.** “One-pot” method of synthesis of phosphine selenides  $R_3PSe$  (where R: Me, Et and *n*-Bu).

Trimethylphosphine selenide ( $Me_3PSe$ ), triethylphosphine selenide ( $Et_3PSe$ ) and tributylphosphine selenide ( $n-Bu_3PSe$ ) were prepared by the «one-pot» method using phosphorus trichloride  $PCl_3$  (NevaReaktiv) and organolithium reagents  $RLi$  (where R=Me, Et and *n*-Bu; purchased from Sigma Aldrich) according to the following scheme:

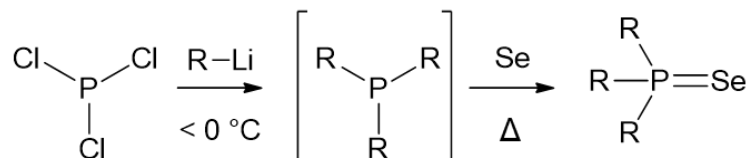

At the first stage a solution of 3 equivalents  $RLi$  was added to a solution of  $PCl_3$  in freshly distilled anhydrous toluene while cooling. Next stage was carried out without phosphine isolation for 5 hours in the presence of 1.5 equivalents of metallic selenium in boiling solvent. The substances were then purified by recrystallization in toluene (in cases of  $Me_3PSe$  and  $Et_3PSe$ ) or by chromatography (in case of  $n-Bu_3PSe$ , sorbent  $Al_2O_3$ , eluent petroleum ether/benzene 1:1).

Tris(tert-butyl)phosphine selenide ( $t-Bu_3PSe$ ), triphenylphosphine selenide ( $Ph_3PSe$ ) and methyldiphenylphosphine selenide ( $MePh_2PSe$ ) were synthesized according to standard methodology described in the literature from commercially available phosphines  $R_3P$  (where R = *t*-Bu, Ph and  $R^1=Me$ ,  $R^2=R^3=Ph$ ) (Sigma Aldrich) by oxidizing them with elemental selenium (Vekton). The reaction was carried out in boiling toluene for 5 hours in the presence of 1.5 equivalents of metallic selenium. The substances were then purified by recrystallization in toluene.

**Figure S1.**  $^1\text{H}$  and  $^{13}\text{C}$  NMR spectra of  $\text{Me}_3\text{PSe}$  in solution in  $\text{CDCl}_3$  at 298 K.

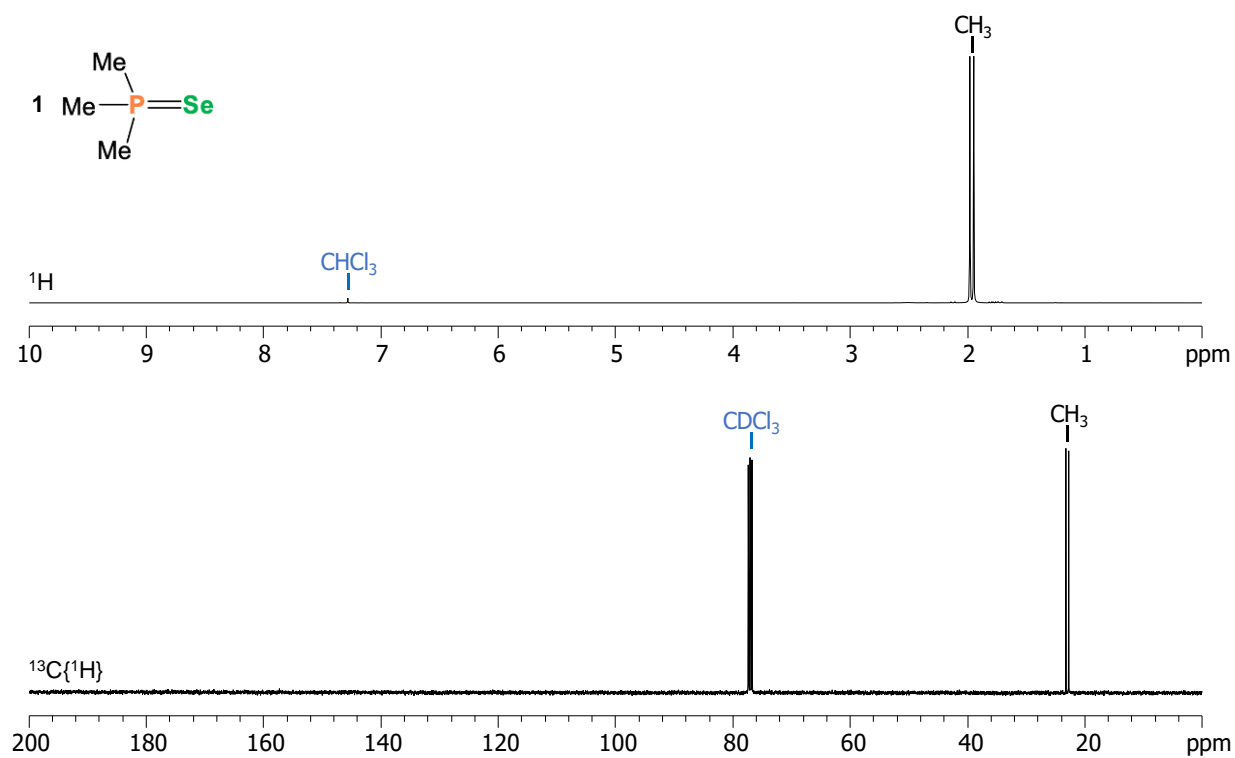

Trimethylphosphine selenide (**1**).  $^1\text{H}$  NMR ( $\text{CDCl}_3$ , 400 MHz):  $\delta$  1.96 (d,  $^2J_{\text{HP}}=13.28$  Hz).  $^{13}\text{C}\{^1\text{H}\}$  NMR ( $\text{CDCl}_3$ , 101 MHz):  $\delta$  23.0 (d,  $^1J_{\text{CP}}=49.0$  Hz).

**Figure S2.**  $^1\text{H}$  and  $^{13}\text{C}$  NMR spectra of  $\text{Et}_3\text{PSe}$  in solution in  $\text{CDCl}_3$  at 298 K.

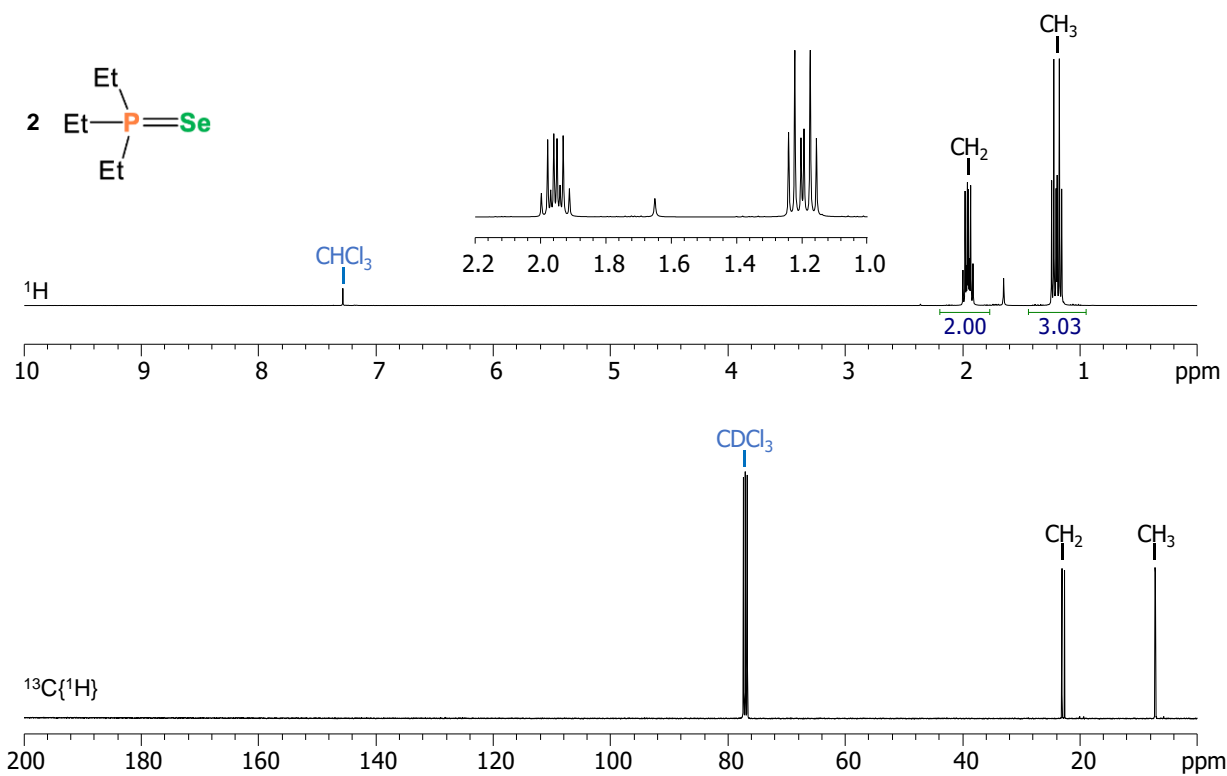

Triethylphosphine selenide (**2**).  $^1\text{H}$  NMR ( $\text{CDCl}_3$ , 400 MHz):  $\delta$  1.95 (dq,  $^2J_{\text{HP}}=11.47$  Hz and  $^3J_{\text{HH}}=7.61$  Hz), 1.20 (dt,  $^2J_{\text{HP}}=18.86$  Hz and  $^3J_{\text{HH}}=7.61$  Hz).  $^{13}\text{C}\{^1\text{H}\}$  NMR ( $\text{CDCl}_3$ , 101 MHz):  $\delta$  22.8 (d,  $^1J_{\text{CP}}=45.0$  Hz), 7.2 (d,  $^2J_{\text{CP}}=4.4$  Hz).

**Figure S3.**  $^1\text{H}$  and  $^{13}\text{C}$  NMR spectra of *n*-Bu<sub>3</sub>PSe in solution in CDCl<sub>3</sub> at 298 K.

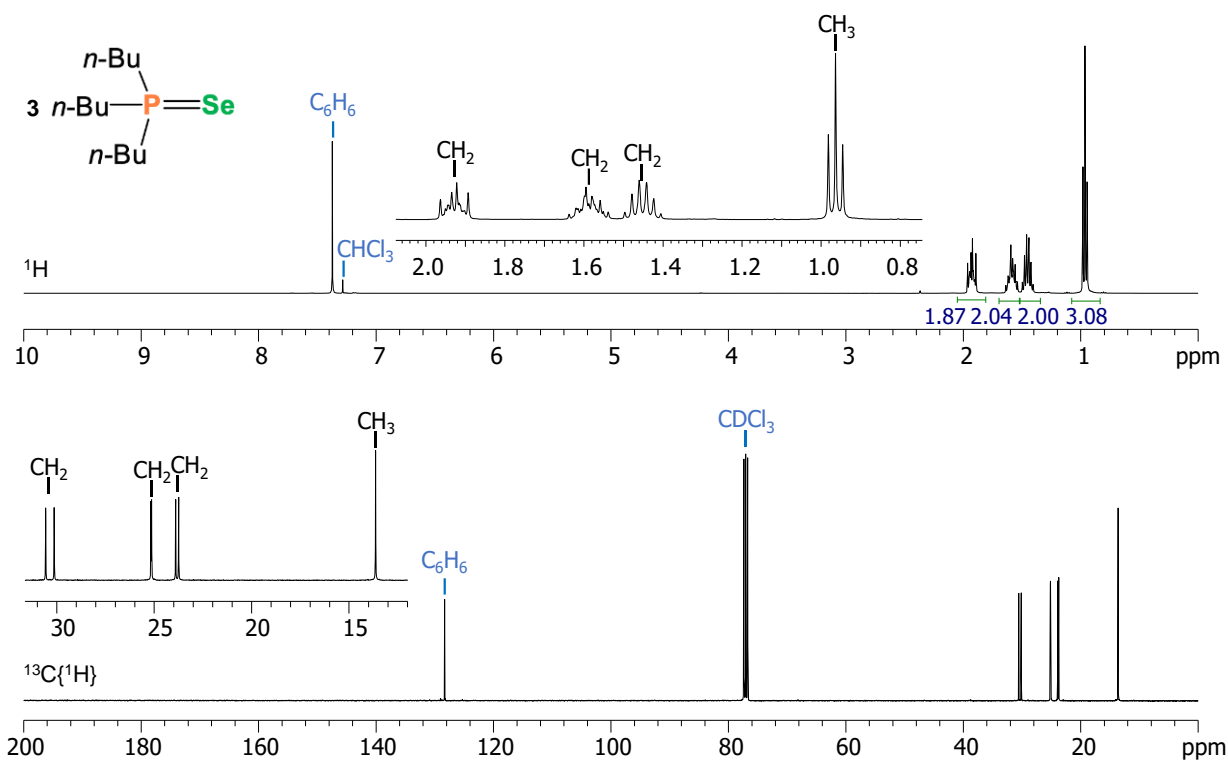

Tributhylphosphine selenide (**3**).  $^1\text{H}$  NMR ( $\text{CDCl}_3$ , 400 MHz):  $\delta$  1.98 – 1.88 (m), 1.67 – 1.52 (m), 1.45 (h,  $^3J_{\text{HH}}=7.23$  Hz), 0.96 (t,  $^3J_{\text{HH}}=7.23$  Hz).  $^{13}\text{C}\{^1\text{H}\}$  NMR ( $\text{CDCl}_3$ , 101 MHz):  $\delta$  30.4 (d,  $^1J_{\text{CP}}=43.9$  Hz), 25.2 (d,  $^2J_{\text{CP}}=3.8$  Hz), 23.8 (d,  $^3J_{\text{CP}}=15.5$  Hz), 13.6 (s).

**Figure S4.**  $^1\text{H}$  and  $^{13}\text{C}$  NMR spectra of  $t\text{-Bu}_3\text{PSe}$  in solution in  $\text{CDCl}_3$  at 298 K.

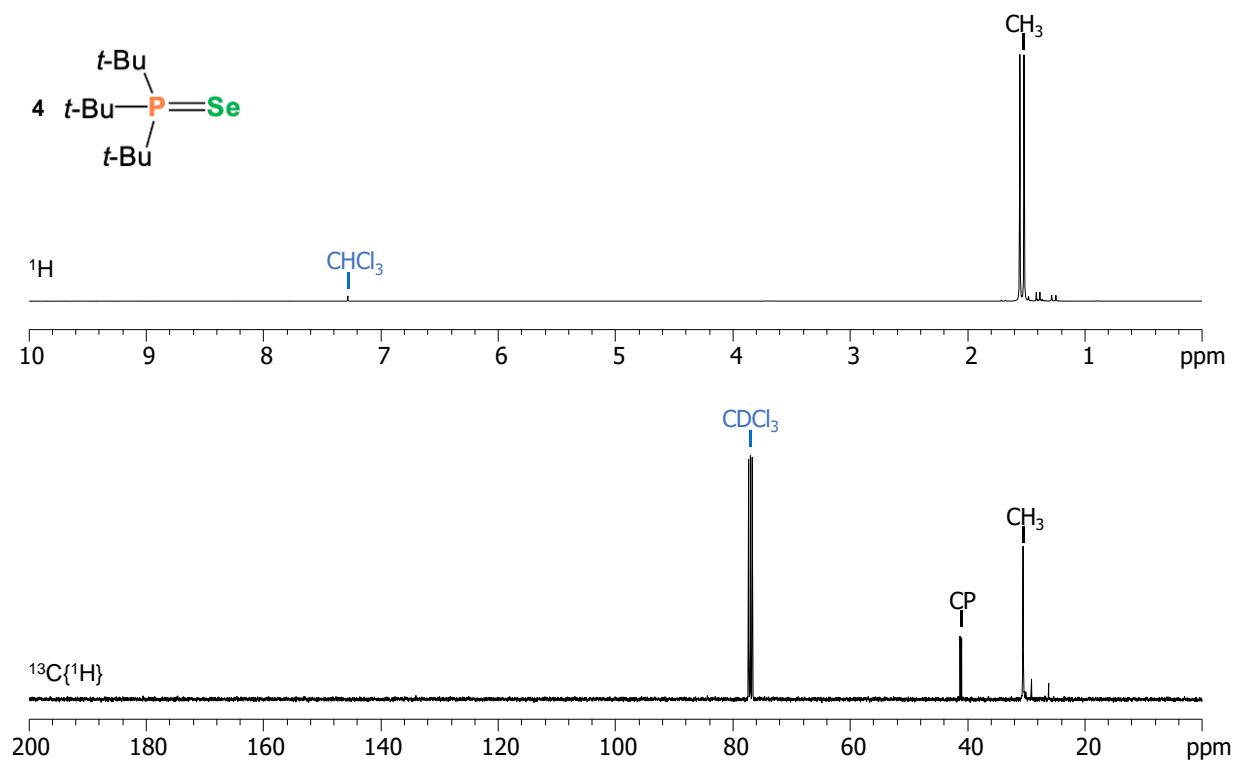

Tris(tert-butyl)phosphine selenide (**4**).  $^1\text{H}$  NMR ( $\text{CDCl}_3$ , 400 MHz):  $\delta$  1.54 (d,  $^3J_{\text{HP}}=14.08$  Hz).  $^{13}\text{C}\{^1\text{H}\}$  NMR ( $\text{CDCl}_3$ , 101 MHz):  $\delta$  41.2 (d,  $^1J_{\text{CP}}=26.1$  Hz), 30.5 (s).

**Figure S5.**  $^1\text{H}$  and  $^{13}\text{C}$  NMR spectra of  $\text{Ph}_3\text{PSe}$  in solution in  $\text{CDCl}_3$  at 298 K.

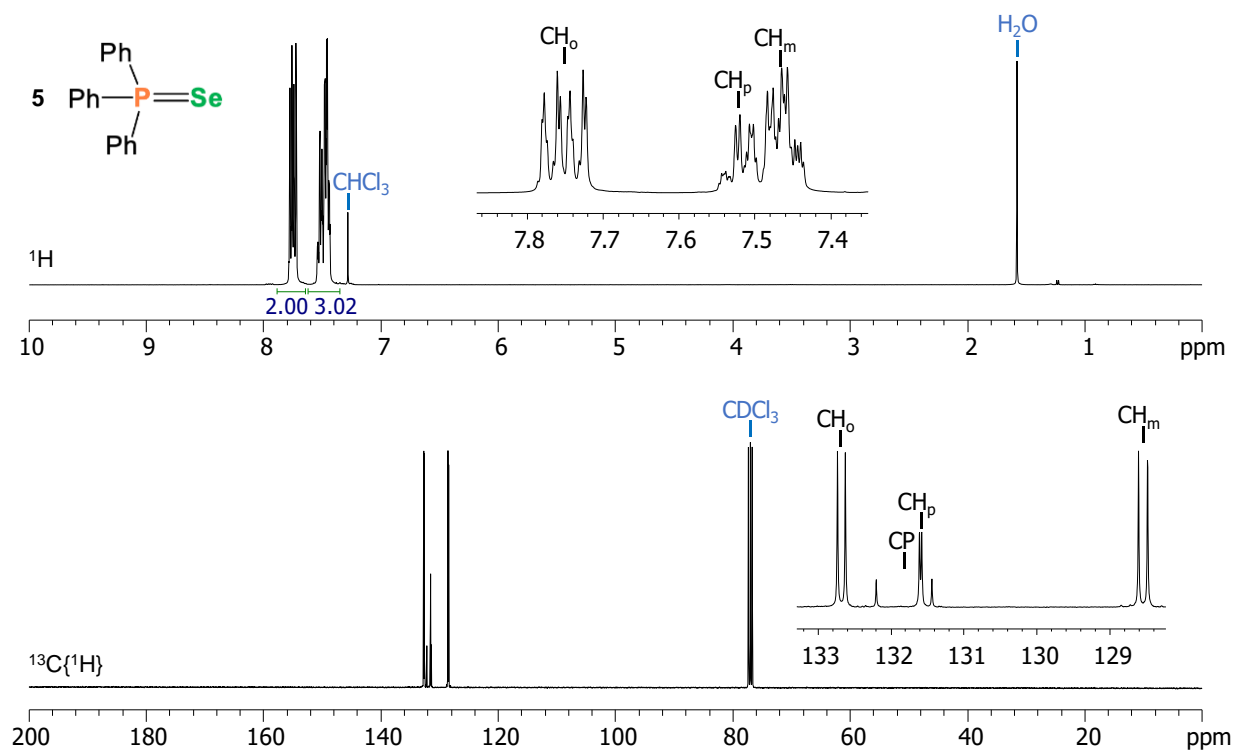

Triphenylphosphine selenide (**5**).  $^1\text{H}$  NMR ( $\text{CDCl}_3$ , 400 MHz):  $\delta$  7.80 – 7.70 (m), 7.56 – 7.49 (m), 7.49 – 7.42 (m).  $^{13}\text{C}\{^1\text{H}\}$  NMR ( $\text{CDCl}_3$ , 101 MHz):  $\delta$  132.7 (d,  $^2J_{\text{CP}}=10.8$  Hz), 131.8 (d,  $^1J_{\text{CP}}=76.7$  Hz), 131.6 (d,  $^4J_{\text{CP}}=3.0$  Hz), 128.5 (d,  $^3J_{\text{CP}}=12.4$  Hz).



**Figure S6.**  $^1\text{H}$  and  $^{13}\text{C}$  NMR spectra of  $\text{MePh}_2\text{PSe}$  in solution in  $\text{CDCl}_3$  at 298 K.

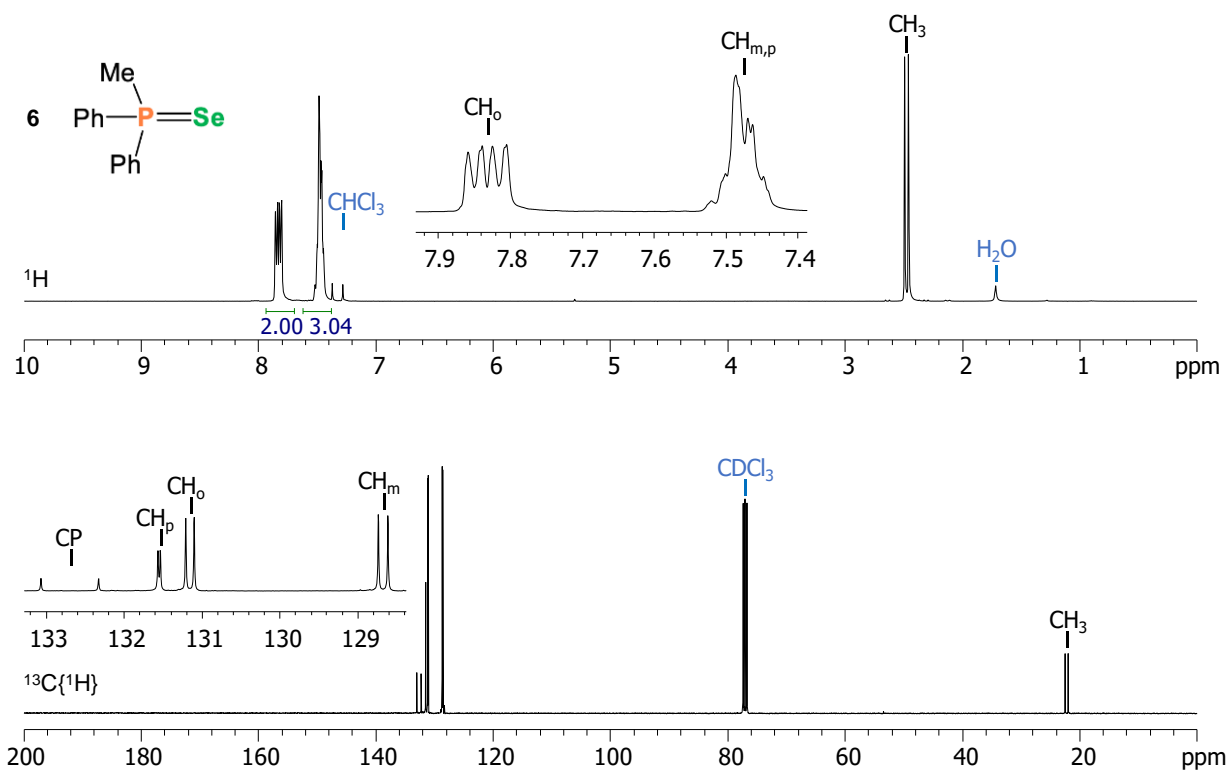

Methyldiphenylphosphine selenide (**6**).  $^1\text{H}$  NMR ( $\text{CDCl}_3$ , 400 MHz):  $\delta$  7.83 (ddd,  $^2J_{\text{HP}}=13.71$  Hz,  $^3J_{\text{HH}}=7.82$  Hz and  $^4J_{\text{HH}}=1.83$  Hz), 7.54 – 7.42 (m).  $^{13}\text{C}\{^1\text{H}\}$  NMR ( $\text{CDCl}_3$ , 101 MHz):  $\delta$  132.7 (d,  $^1J_{\text{CP}}=74.3$  Hz), 131.6 (d,  $^4J_{\text{CP}}=3.1$  Hz), 131.2 (d,  $^2J_{\text{CP}}=10.9$  Hz), 128.7 (d,  $^3J_{\text{CP}}=12.3$  Hz).

**Figure S7.**  $^1\text{H}$  NMR spectra of hydrogen-bonded complexes of  $\text{Et}_3\text{PSe}$  with various substituted phenols in solution in  $\text{CD}_2\text{Cl}_2$  at 180 K.

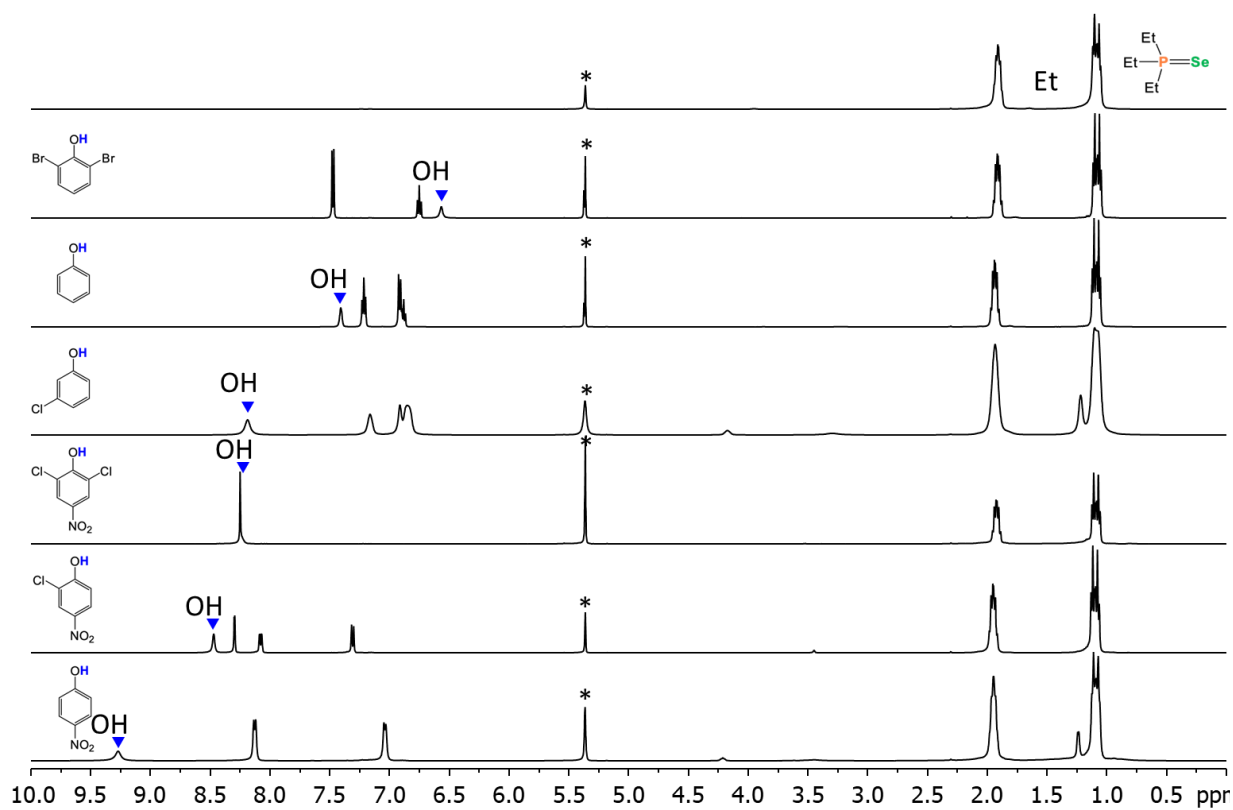

**Figure S8.**  $^1\text{H}$  and  $^{31}\text{P}$  NMR spectra of hydrogen-bonded complex of  $\text{Et}_3\text{PSe}$  with 4-chlorophenol in solution in  $\text{CDF}_3/\text{CDClF}_2$  at 100 K.

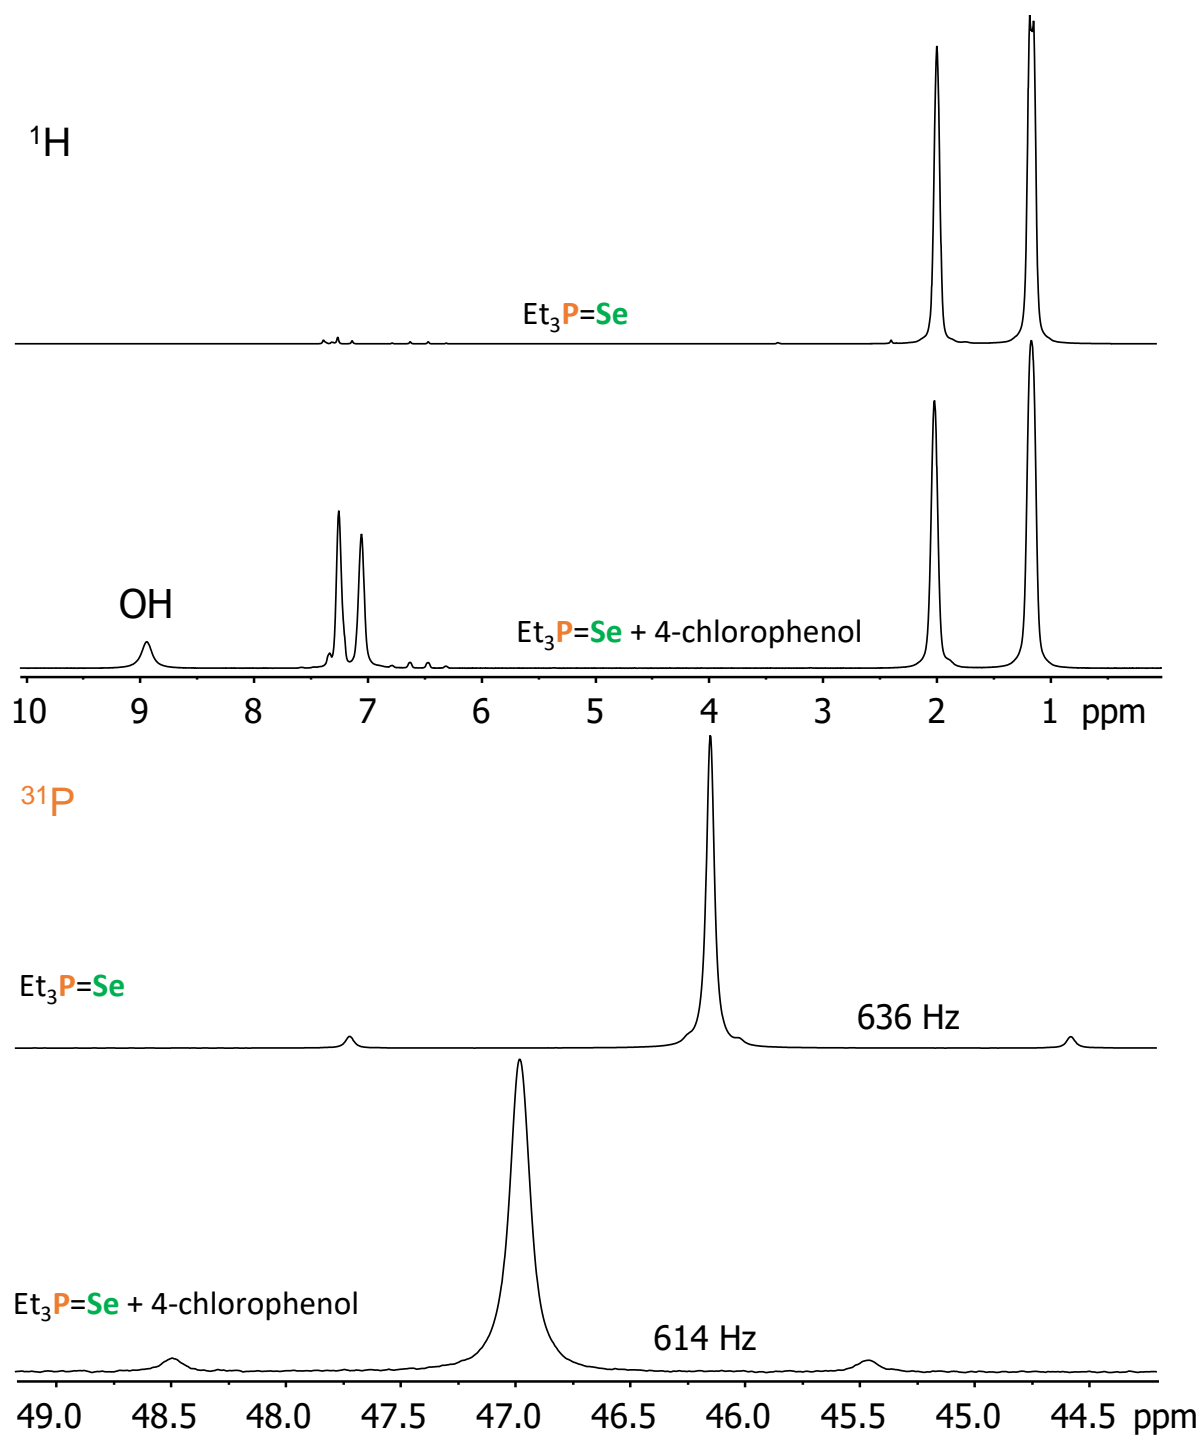

**Figure S9.**  $^1\text{H}$  NMR spectra of halogen-bonded complex of  $\text{Et}_3\text{PSe}$  with 4-fluoriodobenzene in solution in  $\text{CDF}_3/\text{CDClF}_2$  at various temperatures.

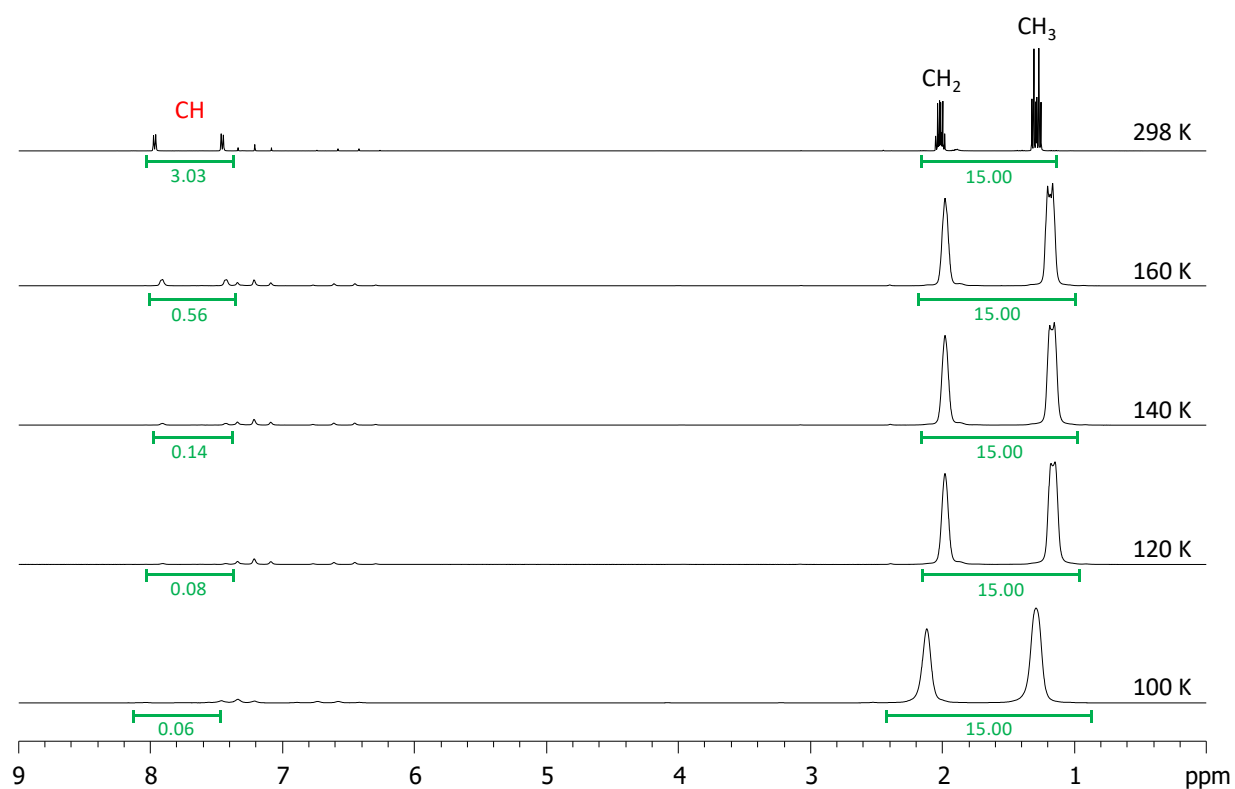

**Table S1.** Crystal data and structure refinement for halogen-bonded complex of Me<sub>3</sub>PSe with C<sub>6</sub>F<sub>5</sub>I (CCDC: 2353352).

|                                             |                                                                                   |
|---------------------------------------------|-----------------------------------------------------------------------------------|
| Identification code                         | Halogen-bonded complex of Me <sub>3</sub> PSe and C <sub>6</sub> F <sub>5</sub> I |
| CSD code                                    | 2353352                                                                           |
| Empirical formula                           | C <sub>9</sub> H <sub>9</sub> F <sub>5</sub> IPSe                                 |
| Formula weight                              | 448.99                                                                            |
| Temperature/K                               | 100(2)                                                                            |
| Crystal system                              | monoclinic                                                                        |
| Space group                                 | P2 <sub>1</sub> /c                                                                |
| a/Å                                         | 6.34130(10)                                                                       |
| b/Å                                         | 27.4987(5)                                                                        |
| c/Å                                         | 7.78480(10)                                                                       |
| α/°                                         | 90                                                                                |
| β/°                                         | 91.554(2)                                                                         |
| γ/°                                         | 90                                                                                |
| Volume/Å <sup>3</sup>                       | 1356.99(4)                                                                        |
| Z                                           | 4                                                                                 |
| ρ <sub>calc</sub> /cm <sup>3</sup>          | 2.198                                                                             |
| μ/mm <sup>-1</sup>                          | 23.105                                                                            |
| F(000)                                      | 840.0                                                                             |
| Crystal size/mm <sup>3</sup>                | 0.05 × 0.04 × 0.01                                                                |
| Radiation                                   | Cu Kα (λ = 1.54184)                                                               |
| 2θ range for data collection/°              | 6.428 to 134.978                                                                  |
| Index ranges                                | -7 ≤ h ≤ 7, -32 ≤ k ≤ 30, -9 ≤ l ≤ 9                                              |
| Reflections collected                       | 8395                                                                              |
| Independent reflections                     | 2432 [R <sub>int</sub> = 0.0395, R <sub>sigma</sub> = 0.0308]                     |
| Data/restraints/parameters                  | 2432/0/157                                                                        |
| Goodness-of-fit on F <sup>2</sup>           | 1.048                                                                             |
| Final R indexes [I ≥ 2σ (I)]                | R <sub>1</sub> = 0.0244, wR <sub>2</sub> = 0.0602                                 |
| Final R indexes [all data]                  | R <sub>1</sub> = 0.0257, wR <sub>2</sub> = 0.0610                                 |
| Largest diff. peak/hole / e Å <sup>-3</sup> | 0.76/-0.83                                                                        |

**Figure S10.**  $^{31}\text{P}$  and  $^{77}\text{Se}$  MAS NMR spectra (12.5 kHz) of phosphine selenides  $\text{Me}_3\text{PSe}$  and  $t\text{-Bu}_3\text{PSe}$  and their complexes with  $\text{C}_6\text{F}_5\text{I}$  at 298 K.

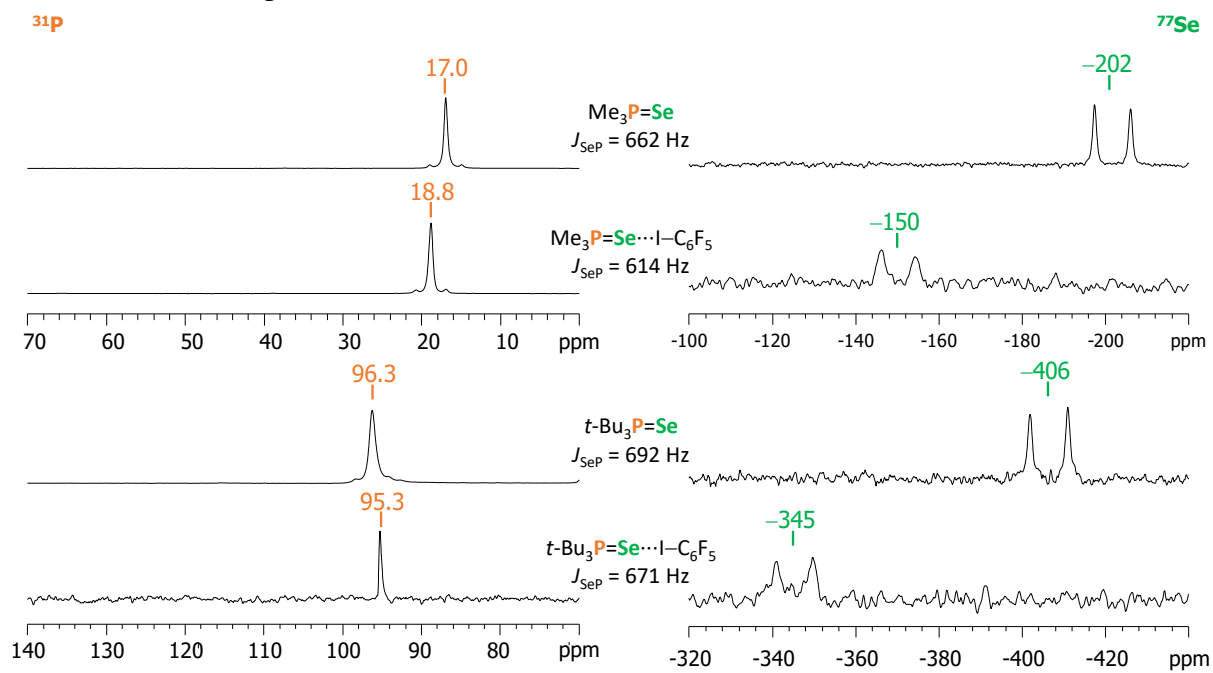

**Figure S11.**  $^{31}\text{P}$  and  $^{77}\text{Se}$  NMR spectra of phosphine selenides  $\text{R}_3\text{PSe}$  (where R: Me, Et, *n*-Bu, *t*-Bu and Ph) in  $\text{C}_6\text{F}_5\text{Br}$  at 298 K.

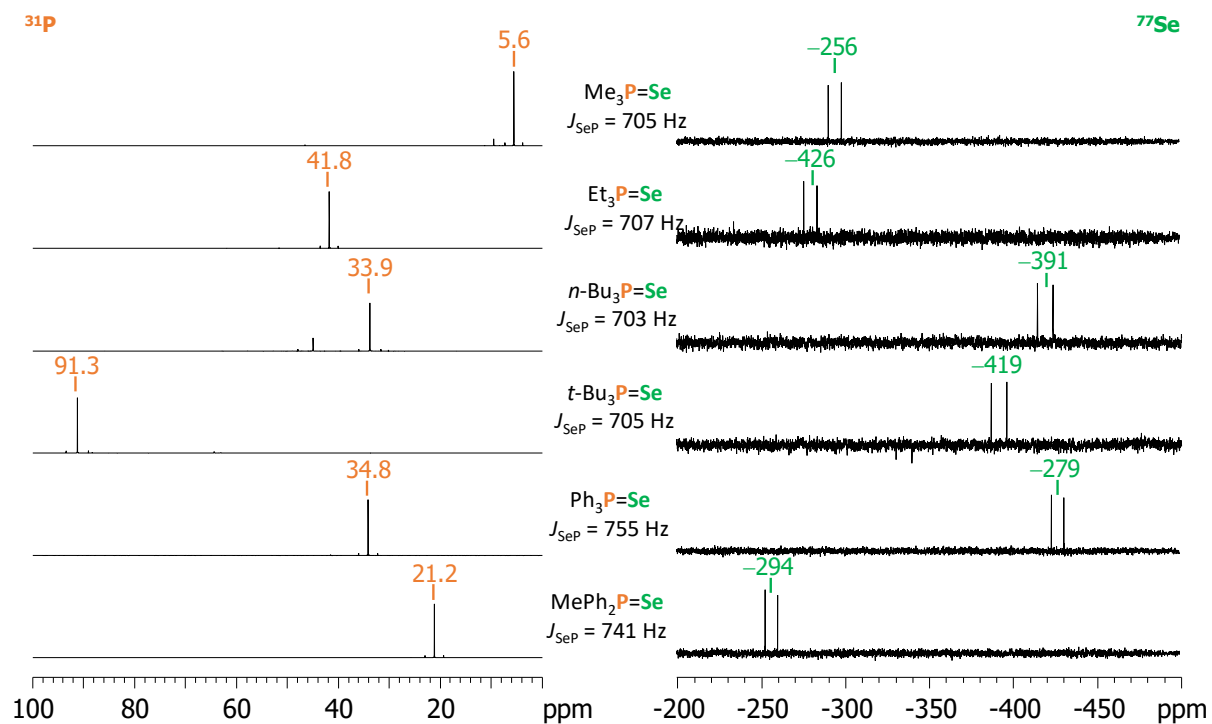

**Table S2.** Experimental NMR parameters of the studied phosphine selenide R<sub>3</sub>PSe (where R: Me, Et, *n*-Bu, *t*-Bu and Ph) in C<sub>6</sub>H<sub>6</sub> and C<sub>6</sub>F<sub>5</sub>Br at 298 K.

| Acceptor                      | Solvent                          | $\delta\text{P}$ | $\Delta\delta\text{P}$ | $\delta\text{Se}$ | $\Delta\delta\text{Se}$ | $J_{\text{PSe}}$ | $\Delta J_{\text{PSe}}$ |
|-------------------------------|----------------------------------|------------------|------------------------|-------------------|-------------------------|------------------|-------------------------|
| Me <sub>3</sub> PSe           | C <sub>6</sub> H <sub>6</sub>    | 5.9              | –                      | –252              | –                       | 713              | –                       |
| Me <sub>3</sub> PSe           | C <sub>6</sub> F <sub>5</sub> Br | 5.6              | –0.3                   | –256              | –4                      | 705              | –8                      |
| Et <sub>3</sub> PSe           | C <sub>6</sub> H <sub>6</sub>    | 42.6             | –                      | –427              | –                       | 717              | –                       |
| Et <sub>3</sub> PSe           | C <sub>6</sub> F <sub>5</sub> Br | 41.8             | –0.8                   | –426              | +1                      | 707              | –10                     |
| <i>n</i> -Bu <sub>3</sub> PSe | C <sub>6</sub> H <sub>6</sub>    | 35.1             | –                      | –393              | –                       | 713              | –                       |
| <i>n</i> -Bu <sub>3</sub> PSe | C <sub>6</sub> F <sub>5</sub> Br | 33.9             | –1.2                   | –391              | +2                      | 703              | –10                     |
| <i>t</i> -Bu <sub>3</sub> PSe | C <sub>6</sub> H <sub>6</sub>    | 91.7             | –                      | –423              | –                       | 711              | –                       |
| <i>t</i> -Bu <sub>3</sub> PSe | C <sub>6</sub> F <sub>5</sub> Br | 91.3             | –0.4                   | –419              | +4                      | 705              | –6                      |
| Ph <sub>3</sub> PSe           | C <sub>6</sub> H <sub>6</sub>    | 34.8             | –                      | –278              | –                       | 757              | –                       |
| Ph <sub>3</sub> PSe           | C <sub>6</sub> F <sub>5</sub> Br | 34.2             | –0.6                   | –279              | –1                      | 755              | –2                      |
| MePh <sub>2</sub> PSe         | C <sub>6</sub> H <sub>6</sub>    | 22.2             | –                      | –291              | –                       | 746              | –                       |
| MePh <sub>2</sub> PSe         | C <sub>6</sub> F <sub>5</sub> Br | 21.2             | –1.0                   | –294              | –                       | 741              | –5                      |



**Figure S12.** Equilibrium structures of halogen-bonded complexes of phosphine selenides  $R_3PSe$  (R: Me, Et, *t*-Bu, *n*-Bu and Ph) with  $C_6F_5Br$ . The values of  $Se\cdots Br$  distance (in angstroms) are marketed in red color. The fractions of the  $Se\cdots I$  distance from the sum of the van der Waals radii of selenium and iodine are shown in green in parentheses ( $\omega_{vdW} = \frac{R_{Se\cdots I}}{R_{vdW}^{Se} + R_{vdW}^I}$ ).

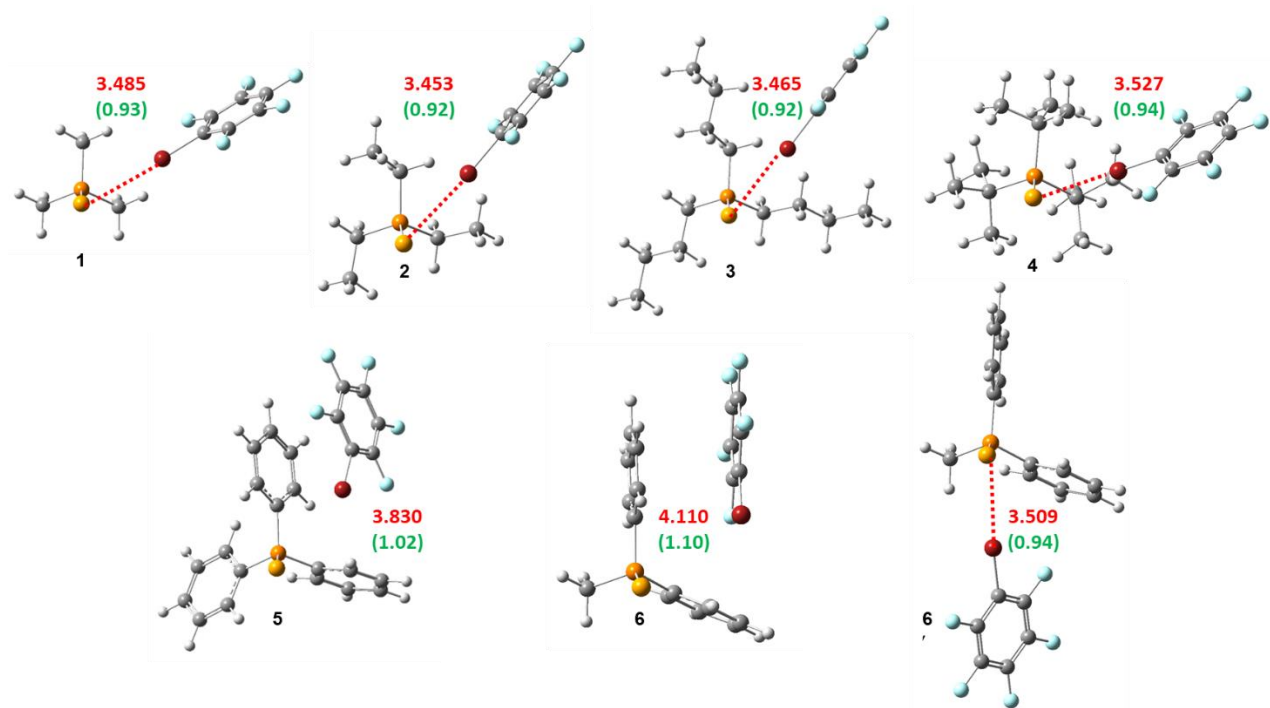

**Table S3.** Calculated geometry (PW6B95-GD3/def2-QZVP) of halogen-bonded complexes of phosphine selenides R<sub>3</sub>PSe (R: Me, Et, *t*-Bu, *n*-Bu and Ph) in vacuum. The distances are given in Å, angles (∠) – in degrees.

| R <sub>3</sub> PSe            | r(P=Se),<br>Å | r(Se-I),<br>Å | r(Se-C),<br>Å | ∠(PSeI),° | ∠(SeIC),° |
|-------------------------------|---------------|---------------|---------------|-----------|-----------|
| <b>Halogen bond Se...I-C</b>  |               |               |               |           |           |
| Me <sub>3</sub> PSe           | 2.108         | 3.367         | 5.461         | 89.0      | 175.7     |
| Et <sub>3</sub> PSe           | 2.115         | 3.325         | 5.422         | 88.5      | 174.8     |
| <i>n</i> -Bu <sub>3</sub> PSe | 2.117         | 3.350         | 5.442         | 92.1      | 174.1     |
| <i>t</i> -Bu <sub>3</sub> PSe | 2.133         | 3.338         | 5.433         | 111.7     | 178.5     |
| Ph <sub>3</sub> PSe           | 2.112         | 3.461         | 5.547         | 89.8      | 177.5     |
| MePh <sub>2</sub> PSe (aryl)  | 2.112         | 3.424         | 5.511         | 86.9      | 174.8     |
| MePh <sub>2</sub> PSe (alkyl) | 2.110         | 3.428         | 5.518         | 85.6      | 176.2     |
| <b>Halogen bond Se...Br-C</b> |               |               |               |           |           |
| Me <sub>3</sub> PSe           | 2.101         | 3.485         | 5.344         | 84.3      | 170.1     |
| Et <sub>3</sub> PSe           | 2.107         | 3.453         | 5.304         | 88.2      | 168.1     |
| <i>n</i> -Bu <sub>3</sub> PSe | 2.109         | 3.465         | 5.311         | 87.6      | 167.2     |
| <i>t</i> -Bu <sub>3</sub> PSe | 2.125         | 3.527         | 5.402         | 108.3     | 178.8     |
| Ph <sub>3</sub> PSe           | 2.101         | 3.830         | 5.276         | 82.0      | 132.7     |
| MePh <sub>2</sub> PSe (aryl)  | 2.097         | 4.110         | 5.332         | 76.4      | 121.8     |
| MePh <sub>2</sub> PSe (alkyl) | 2.103         | 3.509         | 5.380         | 82.2      | 174.9     |
